# The Paf1 complex and P-TEFb have reciprocal and antagonist roles in maintaining multipotent neural crest progenitors

Michael J. Juryne<sup>1,\*</sup>, Xiaoying Bai<sup>2</sup>, Brent W. Bisgrove<sup>3</sup>, Haley Jackson<sup>1</sup>, Alex Nechiporuk<sup>4</sup>, Rebecca A. S. Palu<sup>1</sup>, Hannah A. Grunwald<sup>1</sup>, Yi-Chu Su<sup>3</sup>, Kazuyuki Hoshijima<sup>1</sup>, H. Joseph Yost<sup>3</sup>, Leonard I. Zon<sup>2</sup> and David Jonah Grunwald<sup>1,§</sup>

## ABSTRACT

Multipotent progenitor populations are necessary for generating diverse tissue types during embryogenesis. We show the RNA polymerase-associated factor 1 complex (Paf1C) is required to maintain multipotent progenitors of the neural crest (NC) lineage in zebrafish. Mutations affecting each Paf1C component result in near-identical NC phenotypes; *alyron* mutant embryos carrying a null mutation in *paf1* were analyzed in detail. In the absence of zygotic *paf1* function, definitive premigratory NC progenitors arise but fail to maintain expression of the *sox10* specification gene. The mutant NC progenitors migrate aberrantly and fail to differentiate appropriately. Blood and germ cell progenitor development is affected similarly. Development of mutant NC could be rescued by additional loss of positive transcription elongation factor b (P-TEFb) activity, a key factor in promoting transcription elongation. Consistent with the interpretation that inhibiting/delaying expression of some genes is essential for maintaining progenitors, mutant embryos lacking the CDK9 kinase component of P-TEFb exhibit a surfeit of NC progenitors and their derivatives. We propose Paf1C and P-TEFb act antagonistically to regulate the timing of the expression of genes needed for NC development.

**KEY WORDS:** Paf1 complex, Neural crest, Stem cells, Transcription pausing, Zebrafish mutant, P-TEFb

## INTRODUCTION

RNA Pol II-mediated transcription is a highly regulated process with factors modifying initiation, productive elongation and termination (Chen et al., 2018; Nechaev and Adelman, 2011; Zhou et al., 2012). Studies of the RNA polymerase-associated factor 1 complex (Paf1C) have linked it to each stage of RNA Pol II-mediated transcription, but its precise roles in these events are still unclear. The Paf1C, which is composed of five canonical protein components, Paf1, Ctr9, Cdc73, Rtf1 and Leo1, is recruited to RNA

Pol II molecules following initiation of gene transcription, where it has been proposed to function as a scaffold or ‘platform’ on which factors interact to effect regulation of transcription (Jaehning, 2010; Van Oss et al., 2017). Paf1C has been implicated in facilitating histone modifications, transcription initiation and progression, and RNA termination and processing, but it is best known for its role in promoting elongation at early stages of transcription (Chen et al., 2009; Costa and Arndt, 2000; Gerlach et al., 2017; Kim et al., 2010; Nordick et al., 2008; Penheiter et al., 2005; Rozenblatt-Rosen et al., 2009; Sheldon et al., 2005; Squazzo et al., 2002; Van Oss et al., 2016; Vos et al., 2018a).

Paf1C is not simply a general modulator of transcription, but rather contributes to specific biological processes. Paf1C has been linked to the control of pluripotency in embryo stem cells in culture (Ding et al., 2009; Ponnusamy et al., 2009). It is essential for the expression of a subset of genes in yeast, and mutations affecting the complex have discrete tissue-specific phenotypes in *Drosophila* and vertebrates (Akanuma et al., 2007; Bahrapour and Thor, 2016; Kim et al., 2012; Langenbacher et al., 2011; Mosimann et al., 2006, 2009; Nguyen et al., 2010; Penheiter et al., 2005). Although Paf1C has been most often associated with positive aspects of transcription, paradoxically, several studies have indicated that Paf1C can also have an inhibitory role: Paf1C has been shown to function antagonistically to positive elongation factors during the development of erythroid progenitors and in oligodendrocyte differentiation (Bai et al., 2010; Kim et al., 2012). Given the range of phenotypes associated with loss of Paf1C function and the diversity of biochemical activities associated with the Paf1C, it is likely that Paf1C has cell- or tissue-specific functions dependent on the presence of other regulatory factors (Van Oss et al., 2017).

Finally, Paf1C has been implicated in maintaining promoter-proximal paused RNA Pol II (Chen et al., 2015), although its role in this process is still controversial (Van Oss et al., 2017; Vos et al., 2018b). The release of promoter-proximal RNA Pol II is a crucial regulatory step in gene activation (Adelman and Lis, 2012; Gaertner and Zeitlinger, 2014). Pause release is promoted by recruitment of the positive transcription elongation factor b (P-TEFb) complex, the activity of which requires the CDK9 kinase. P-TEFb phosphorylates, displaces and modifies negative regulators of transcription elongation in addition to promoting phosphorylation of residues in the C-terminal domain (CTD) of RNA Pol II, thereby stimulating productive RNA Pol II elongation (Li et al., 2018; Lu et al., 2016; Peterlin and Price, 2006). Although the biological significance of promoter-proximal paused RNA Pol II is unclear, speculation has focused on its potential role in multipotent precursor cells (Min et al., 2011). Pausing may serve as a regulatory mechanism to effect a rapid transcription response to stimuli or to coordinate the synchronous induction of multiple genes in response to developmental cues (Adelman et al., 2009; Adelman and Lis,

<sup>1</sup>Department of Human Genetics, University of Utah, Salt Lake City, UT 84112, USA.

<sup>2</sup>Stem Cell Program and Division of Hematology/Oncology, Children’s Hospital and Dana Farber Cancer Institute, Howard Hughes Medical Institute, Harvard Medical School, Boston, MA 02115, USA. <sup>3</sup>Department of Neurobiology and Anatomy, University of Utah, Salt Lake City, UT 84132, USA. <sup>4</sup>Department of Cell and Developmental Biology, School of Medicine, Oregon Health & Science University, Portland, OR 97239, USA.

\*Present address: Department of Orthopaedics, University of Utah, Salt Lake City, UT 84108, USA.

§Author for correspondence (grunwald@genetics.utah.edu)

© M.J.J., 0000-0003-2702-9164; H.J., 0000-0002-3326-5035; H.A.G., 0000-0002-0553-906X; H.J.Y., 0000-0003-2961-5669; L.I.Z., 0000-0003-0860-926X; D.J.G., 0000-0002-6784-6647

2012; Boettiger and Levine, 2009; Gariglio et al., 1981; Gerlach et al., 2017; Henriques et al., 2013; Levine, 2011; Mayer et al., 2017; Rahl et al., 2010; Rougvie and Lis, 1988).

Here, we report that unbiased forward genetic screens reveal Paf1C is needed to maintain multipotent progenitors of the neural crest (NC) lineage. The NC is one of the earliest stem cell-like populations to arise in the embryo (Le Douarin and Kalcheim, 1999). It is a uniquely vertebrate population of multipotent cells that contributes to a dramatic range of tissues, including craniofacial cartilage and bone, pigment cells of the skin and inner ear, the enteric and peripheral nervous systems, neurons and glia, and neuroendocrine cells. The NC arises through a gene regulatory network (reviewed by Simoes-Costa and Bronner, 2015) initiated by the convergence of multiple growth factor signaling pathways that activate a transcription factor cascade leading to induction and specification of precursors, and finally establishment of a definitive premigratory NC progenitor population at the dorsal surface of the neural tube. The progenitors then migrate along defined routes responding to environmental cues that shape their terminal positions and differentiation (Bronner and Simões-Costa, 2016; Vega-Lopez et al., 2017). Knowledge of the dynamic cellular and genetic events that mark the origins of NC precursor cells and their developmental progression toward a dedicated progenitor state makes this lineage particularly useful for associating gene functions with the attainment of specific stages of NC identity.

We find the Paf1C is required *in vivo* to maintain multipotent progenitors of the NC and additional embryonic stem cell populations, including primitive blood progenitors and primordial germ cells. Loss of zygotic expression of any of the proteins comprising the Paf1C produces embryos that are severely deficient in NC-derived tissues. Our results reveal an antagonistic relationship between Paf1C and the pause-release factor P-TEFb in maintaining the multipotent NC precursor population. Loss of the essential CDK9 kinase component of P-TEFb suppresses the NC phenotype of *paf1* mutants. Consistent with the interpretation that limiting expression of some genes helps maintain progenitors, *cdk9* mutant embryos exhibit a surfeit of NC tissue. Our results indicate that the antagonistic activity of Paf1C and P-TEFb on RNA Pol II transcription activity is essential to maintain the multipotential NC progenitor population *in vivo*.

## RESULTS

### *paf1* is essential for neural crest formation

*alyron*<sup>z12</sup> (*aln*) mutant embryos have a severe loss of NC-derived tissues, with a complete lack of melanophores (Fig. 1A,B) (Cretokos and Grunwald, 1999). *aln*<sup>z12</sup> is a complex mutation consisting of an insertion of multiple rearranged plasmid elements and a deletion of genomic sequences near the south telomere of chromosome 15 (Fig. S1) (Cretokos and Grunwald, 1999). We proceeded to identify the single gene responsible for the NC phenotype. We found an overlapping deficiency, *c4* (Fisher et al., 1997), that failed to complement the NC functions affected by *aln*<sup>z12</sup> (Fig. 1C). The region deleted in both mutations defined a ‘critical region’ containing the gene responsible for the *aln* NC phenotype. A new ENU-induced allele, *aln*<sup>z24</sup>, was isolated from a non-complementation screen. *aln*<sup>z12</sup>/*aln*<sup>z24</sup> transheterozygotes and *aln*<sup>z24</sup> homozygotes appear remarkably similar to the original *aln*<sup>z12</sup> mutant, with a severe block to NC migration and differentiation, indicated by the absence of *crestin* expression in the trunks of 24 h post-fertilization (hpf) mutant embryos and the absence of pigmentation in 48 hpf mutant embryos (Fig. 1D-G).

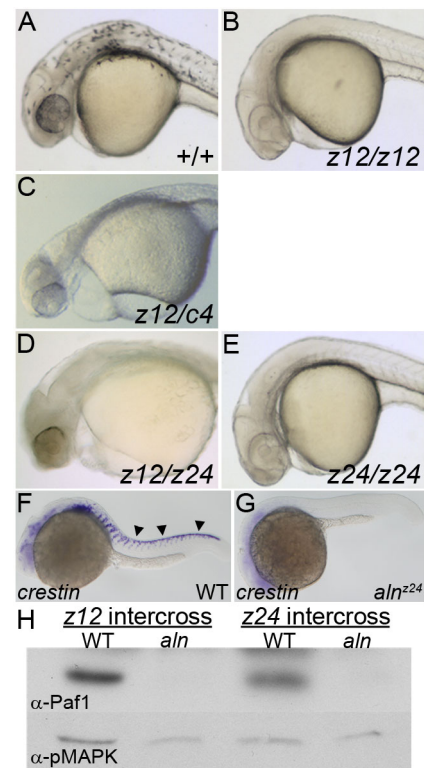

**Fig. 1. *aln*<sup>z24</sup> is a null mutation that regulates NC formation and encodes RNA polymerase II-associated factor 1 (Paf1).** (A-E) 36 hpf wild-type and *aln* mutant embryos. Wild-type embryos (A) have pigmented melanophores lacking in embryos harboring combinations of *aln* mutant alleles: (B) homozygous for the *aln*<sup>z12</sup> deletion mutation, (C) transheterozygous for the *aln*<sup>z12</sup> and *c4* deletions, (D) transheterozygous for the *aln*<sup>z12</sup> deletion and *aln*<sup>z24</sup> ENU-induced mutations, and (E) homozygous for the *aln*<sup>z24</sup> mutation. (F,G) *crestin* expression detected by whole-mount *in situ* hybridization in 24 hpf wild-type sibling (F) and *aln*<sup>z24</sup> mutant (G) embryos, indicating a complete absence of migrating trunk NC in *aln*<sup>z24</sup>. Arrowheads indicate premigratory and migrating trunk NC. A-G are lateral views with anterior to the left. (H) Paf1 protein is not detected by immunoblot analysis in 36 hpf *aln*<sup>z12</sup> or *aln*<sup>z24</sup> mutant embryos, but is readily detected in wild-type control siblings. Immunoblot detection of pMAPK serves as a protein-loading control.

Map crosses indicated *aln*<sup>z24</sup> segregated as a simple recessive mutation and placed it within the *aln*<sup>z12</sup>/*c4* critical region (Fig. S1 and data not shown).

The *aln* NC phenotype is due to loss of function of a single gene, *paf1*, which encodes the Paf1 protein associated with the eponymous transcription factor complex. Morpholino oligonucleotide (MO) knockdown of selected candidate genes within the critical region revealed that embryos lacking *paf1* function had striking resemblance to *aln* mutants. Sequencing of *paf1* cDNA derived from wild-type and mutant embryos identified a C>A transversion (nucleotide position 843 of the cDNA, NM\_001024453) that resulted in a premature stop codon at amino acid 281 in the *aln*<sup>z24</sup> allele (Fig. S1). Consistent with the genetic analyses indicating the *aln* alleles are null mutations, 36 hpf *aln*<sup>z12</sup> and *aln*<sup>z24</sup> mutant embryos lacked Paf1 protein (Fig. 1H). As the *paf1* transcript and its protein product are maternally supplied and broadly expressed (Fig. S1), the *aln*<sup>z24</sup> phenotype reflects the earliest requirements for zygotic *paf1* function.

Two additional experiments confirmed loss of *paf1* gene function was responsible for the entire *aln* NC phenotype. First, overexpression of wild-type but not *aln*<sup>z24</sup> mutant (843C>A) *paf1*

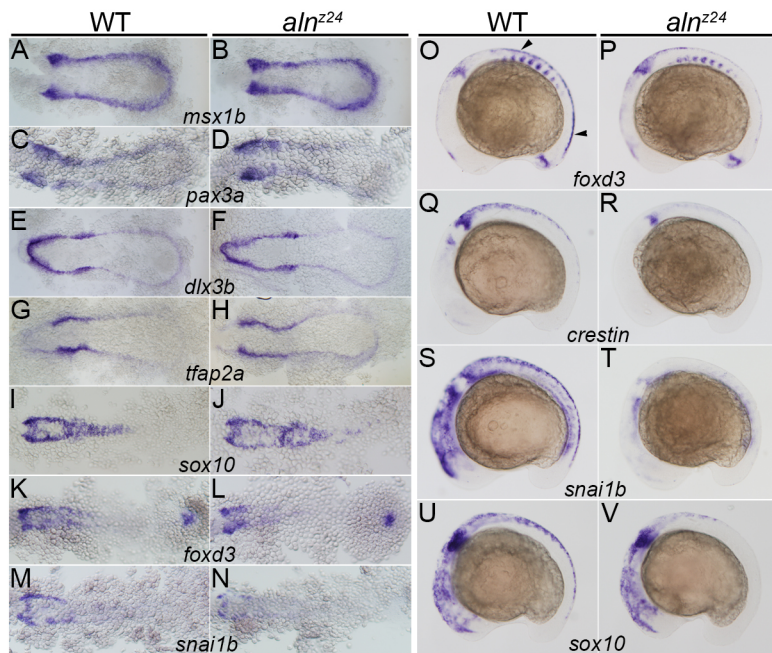

**Fig. 2. Zygotically supplied Paf1 is not required for the initial induction or specification of the premigratory NC, but is required at later stages for development of the full premigratory and migrating NC population.** Gene expression detected by whole-mount *in situ* hybridization in 11-11.5 hpf (A-D), 11.5-12 hpf (E-J), 12-12.5 hpf (K-N) and 16 hpf (O-V) wild-type sibling and *aln<sup>z24</sup>* mutant embryos. Expression of *msx1b* (A,B), *pax3a* (C,D), *dlx3b* (E,F), *tfap2a* (G,H) and *sox10* (I,J) is similar in *aln<sup>z24</sup>* mutants and wild-type siblings. A slight decrease in *foxd3* (K,L) and *snai1b* (M,N) expression is detected in *aln<sup>z24</sup>* embryos when compared with wild-type siblings. Expression of *foxd3* (O,P), *crestin* (Q,R), *snai1b* (S,T) and *sox10* (U,V) are all reduced or absent in the trunk region of 16 hpf *aln<sup>z24</sup>* mutant embryos. A-N are dorsal views with anterior towards the left. O-V are lateral views with anterior towards the left. Arrowheads indicate premigratory NC.

mRNA rescued melanophore formation in *aln<sup>z12</sup>* or *aln<sup>z24</sup>* mutant embryos (Fig. S2). Second, all wild-type eggs injected with a *paf1* splice-blocking MO (*paf1* SB MO; see Materials and Methods) developed as phenocopies of the *aln<sup>z24</sup>* mutant, an effect that could be rescued completely by co-injection with wild-type *paf1* mRNA (Fig. S2).

#### Establishment but not maintenance of NC progenitors in zygotic *aln/paf1* mutants

Given the complete loss of trunk NC derivatives in *aln<sup>z24</sup>*, we analyzed expression of key transcription factor genes that mark NC development (Simoes-Costa and Bronner, 2015) to identify the first stage of NC development that requires zygotic *paf1* gene function (Fig. 2). The earliest known markers expressed by precursors of the NC are *msx1b* and *pax3a*, which mark cells at the border of the non-neural and neural ectoderm, the region in which NC is induced. At 11-11.5 hpf, *msx1b* and *pax3a* were expressed comparably in wild-type and *aln<sup>z24</sup>* mutant embryos (Fig. 2A-D). Expression of genes that function in early NC specification downstream of *msx1b* and *pax3a*, including *dlx3b*, *tfap2a* and *sox10*, also appeared unaffected in 11.5-12 hpf *aln<sup>z24</sup>* mutant embryos (Fig. 2E-J). However, shortly after this period, at 12-12.5 hpf, mutant embryos exhibited slight reductions in the expression of NC markers, such as *foxd3* and *snai1b* (Fig. 2K-N).

As premigratory NC emerges at the dorsal aspect of the neural keel, expression of NC markers dissipates in *aln<sup>z24</sup>* null mutant embryos (Fig. 2O-V). Loss of zygotic *paf1* resulted in reduction of *foxd3* gene expression, an early lineage marker of premigratory NC, and complete loss of *crestin*, *snai1b* or *sox10* in the trunks of 16 hpf mutant embryos. As observed previously, trunk NC was affected more severely than cranial NC in *aln* mutant embryos (Cretokos and Grunwald, 1999). Whereas trunk derivatives were not detected in the absence of zygotic *paf1* function, craniofacial NC structures were present but reduced in mutants (Cretokos and Grunwald, 1999) or upon knockdown of zygotic Paf1 protein expression (Fig. 4R). In summary, premigratory NC arises normally in *aln<sup>z24</sup>* mutant embryos, but zygotic *paf1* function is required to maintain this NC lineage in the trunk.

#### *paf1* function is required cell autonomously for maintenance of NC progenitors

Many factors required for NC development have primary functions in the patterning of precursor tissues and only indirectly affect the generation of NC (Mayor et al., 1997; Nguyen et al., 1998; Villanueva et al., 2002). To determine whether Paf1 is required in developing NC cells, we expressed the Paf1 protein in the NC lineage of embryos otherwise devoid of zygotic *paf1* product. A 6.5 kb fragment of the *msx1b* promoter was used to drive gene expression in the NC precursor domain (Fig. 3A,B). As injected plasmid DNA is distributed mosaically in developing embryos, injection of the *msx1b::GFP* plasmid into one-cell stage embryos resulted in GFP expression in subsets of the *msx1b* expression domain at 11-11.5 hpf (Fig. 1C), confirming the spatial and temporal specificity of the promoter fragment. Whereas expression of GFP in the *msx1b* domain did not rescue NC development in *aln<sup>z24</sup>* embryos (Fig. 3D-F), most mutant embryos injected with the *msx1b::paf1* construct (48/72) had significant numbers of melanophores present in both the cranial and trunk regions at 48 hpf (Fig. 3G). The rescued melanophores appeared normal, migrating away from the dorsal neural tube and assuming the stellate morphology of wild-type cells (Fig. 3D,G). These results demonstrate that defective NC development in *aln* mutants is due solely to the cell-autonomous requirement for *paf1* function in developing NC cells.

#### The *aln/paf1* mutant reveals a previously unrecognized function in NC development

We attempted to place *paf1* function within the gene regulatory network that has been proposed to drive NC development (Simoes-Costa and Bronner, 2015). Although the first detectable alteration in *aln<sup>z24</sup>* embryos is slightly reduced *foxd3* and *snai1b* expression (Fig. 2K-N), forced overexpression of those genes failed to ameliorate the mutant phenotype (data not shown), suggesting *paf1* provides additional functions necessary for maintaining the premigratory NC population. Mutants that lack both *foxd3* and *tfap2a* functions are phenotypically similar to *paf1*-deficient embryos (Arduini et al., 2009; Wang et al., 2011). These genes

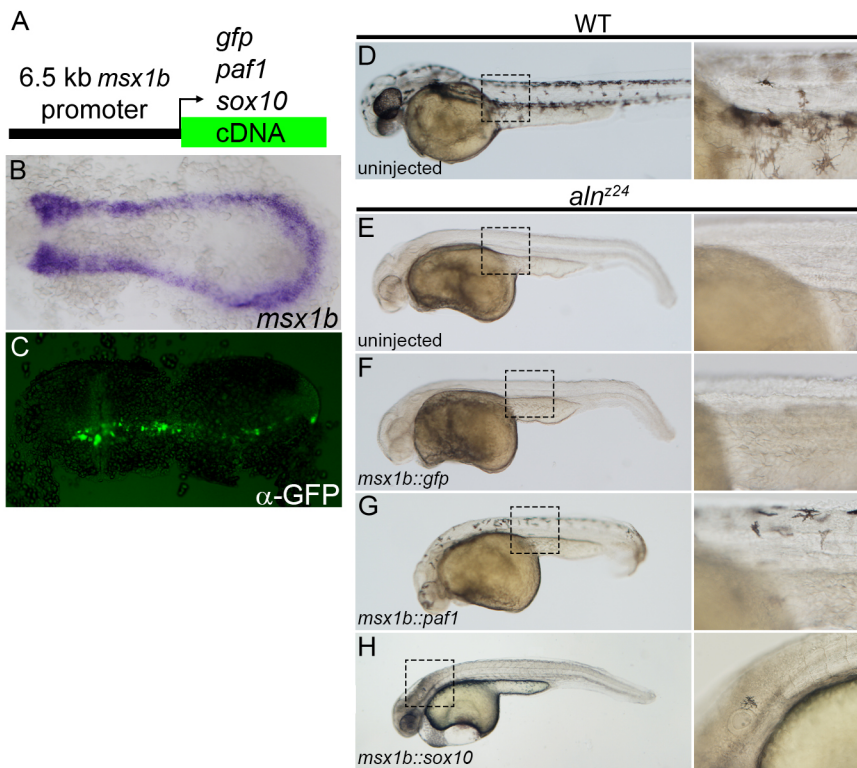

**Fig. 3. Paf1 is required cell-autonomously in the NC lineage for melanophore development.**

(A) Schematic representation of a *msx1b* promoter construct used to express *gfp*, *paf1* or *sox10* cDNAs. (B) Endogenous *msx1b* expression in an 11.5 hpf embryo detected by whole-mount *in situ* hybridization. (C) GFP (detected by immunohistochemistry) is expressed mosaically, but only within the normal *msx1b* expression domain of an 11.5 hpf embryo injected at the one-cell stage with 50 pg *msx1b::GFP* plasmid DNA. (D-H) 48 hpf control and DNA-injected embryos. (D) Wild-type embryo exhibiting normal distribution and morphology of melanophores. Uninjected *aln<sup>z24</sup>* mutant embryos (E) and *aln<sup>z24</sup>* mutants injected with *msx1b::GFP* plasmid DNA (F) completely lack NC-derived melanophores. (G) *aln<sup>z24</sup>* mutants injected with *msx1b::paf1* plasmid DNA have widely distributed melanophores with normal stellate morphology. (H) Expression of *sox10* in the *msx1b* expression domain fails to rescue melanophore development; abnormal pigment cells were occasionally found in the heads of plasmid-injected mutant embryos. (B,C) Dorsal views of flat-mounted embryos, with anterior towards the left. D-H are lateral views of entire embryos (anterior towards the left); boxed regions are shown at higher magnification to the right of each whole-embryo view.

are thought to promote early stages in specification, and the requirement for them can be bypassed by forced expression of SoxE family genes (Arduini et al., 2009). However overexpression of *sox10* (a SoxE family member) in the *msx1b* expression domain of *aln<sup>z24</sup>* mutants failed to rescue trunk melanophore development in this mutant background (Fig. 3H). Finally, we investigated whether *aln* mutant NC cells appear to translocate into neural tissue, as they do in embryos lacking both *tfap2a* and *tfap2c* (Li and Cornell, 2007). In 11-11.5 hpf wild-type embryos, the NC occupies the region between the *sox2*-expressing neural plate and *dlx3b*-expressing pre-placodal ectoderm. In embryos depleted for the *tfap2a* and *tfap2c* genes, the *sox2* expression domain is expanded so it abuts directly onto the *dlx3b* domain. In contrast, the patterning of *sox2* and *dlx3b* domains appears normal in *aln<sup>z24</sup>* mutants, consistent with the interpretation that NC is induced normally in *aln* mutants (Fig. S3). In summary, *paf1* provides functions that are distinct from genes whose contributions to NC development have been previously characterized, including *snai1b*, *sox10*, *foxd3* or *tfap2a* and *tfap2c*.

The cells occupying the premigratory NC domain do not simply die *in situ*. Confirming earlier work that did not detect apoptosis in the early NC of *aln<sup>z12</sup>* mutants (Cretekos and Grunwald, 1999), we could not distinguish mutant and wild-type 14 hpf embryos by virtue of staining for anti-activated caspase 3, nor were we able to rescue the *aln<sup>z24</sup>* phenotype by suppressing p53-mediated cell death using a p53 MO (Robu et al., 2007) (data not shown).

As *sox10* mRNA expression is unaffected at early stages of NC specification in 11.5-12 hpf *aln<sup>z24</sup>* mutant embryos (Fig. 2I,J), we used a transgene [*Tg(-4.9sox10:egfp)<sup>ba2</sup>*] (Park et al., 2005) in which eGFP expression is driven from the *sox10* promoter to trace the fates of the NC progenitor cells in *aln<sup>z24</sup>* mutants (Fig. 4). At 26-28 hpf, premigratory as well as migrating NC express eGFP in the trunk of wild-type embryos (Fig. 4A,F), and *sox10* mRNA and protein are detectable in these cells (Fig. 4C,G,H). Fewer eGFP<sup>+</sup> cells are apparent in *aln<sup>z24</sup>* mutant embryos of the same stage

(Fig. 4B); many of those remain close to the dorsal neural tube with some that appear to be migrating from this region along normal pathways (Fig. 4J). Significantly, unlike in wild-type embryos, the mutant eGFP<sup>+</sup> NC cells do not maintain expression of *sox10* mRNA or protein (Fig. 4D,K,L). In summary, in the absence of zygotic *paf1*, mutant NC cells initiate the gene expression program and normal behaviors of NC, but they fail to maintain NC gene expression or identity, and fail to populate their normal destinations.

We sought to determine whether the aberrantly migrating trunk NC eventually gave rise to appropriate derivatives. Neither *aln<sup>z12</sup>* nor *aln<sup>z24</sup>* embryos generate pigmented melanophores during the first 2 days of development, the time at which null mutants begin to appear severely disturbed (Fig. 1) (Cretekos and Grunwald, 1999). To measure the effect of loss of *paf1* on the later development of NC-derived dorsal root ganglion (DRG) cells and enteric neurons, moderate doses of *paf1* SB MO were injected into eggs harboring transgenes that marked formation of these cell types. These embryos displayed intermediate phenotypes: some melanophores formed, but other characteristics of the *aln* phenotype were observed, including pericardial edema and reduction of the jaw (Fig. 4M,N,Q, R). The partially *paf1*-depleted embryos failed to generate any detectable enteric neurons (Fig. 4O,P), and possessed consistently reduced numbers of DRGs (Fig. 4S,T and Fig. S4). It is likely that NC progenitors completely lacking zygotic *paf1* fail to give rise to any of the normal trunk NC derivative tissues.

#### ***paf1* is required for additional progenitor populations in the embryo**

The *aln* mutant was identified solely on the basis of its NC phenotype; initial characterization demonstrated that loss of *aln* function did not have additional discernible effects on patterning or cell differentiation in the central nervous system (Cretekos and Grunwald, 1999). As loss of zygotic *paf1* affected maintenance of the multipotent premigratory population of NC, we examined the

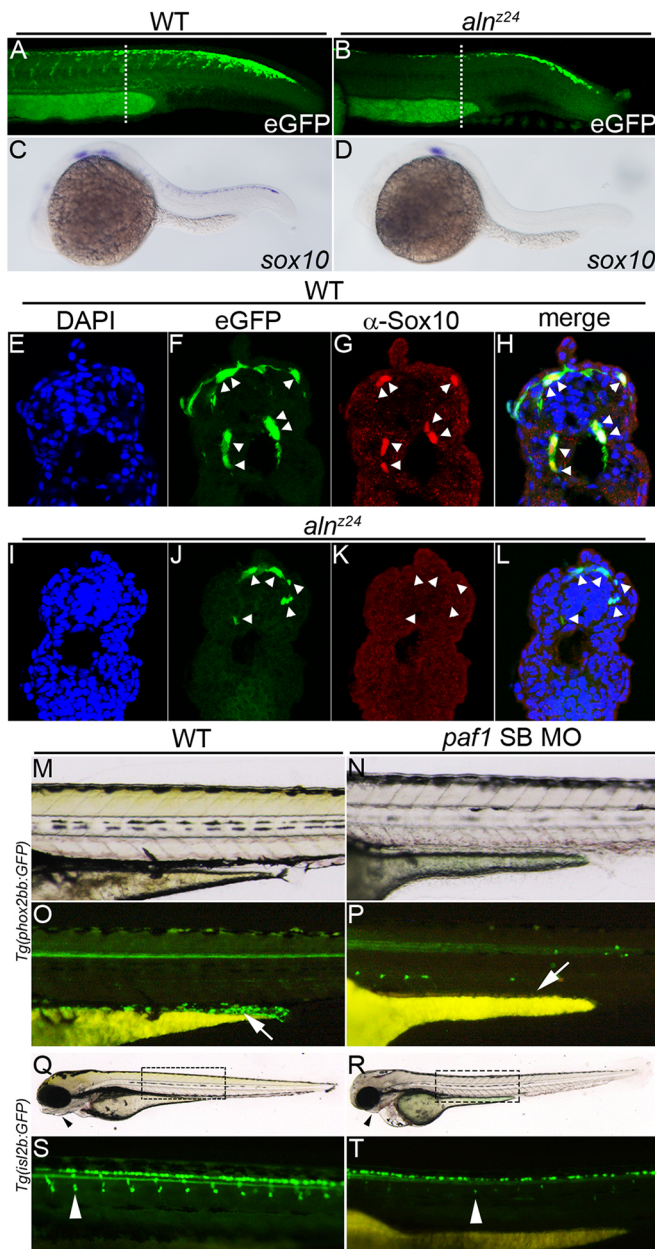

**Fig. 4. Paf1 is necessary to maintain NC gene expression, identity and the normal complement of multipotent premigratory NC.** (A,B) Confocal images of eGFP expression in 26–28 hpf wild-type (A) and *aln<sup>224</sup>* mutant (B) embryos carrying the *Tg(-4.9sox10:egfp)<sup>ba2</sup>* transgene. Dashed lines indicate approximate plane of section in E–L. (C,D) *sox10* gene expression detected by whole-mount *in situ* hybridization in 24 hpf wild-type (C) and *aln<sup>224</sup>* mutant (D) embryos. (E–L) Transverse sections through the trunks of 26–28 hpf wild-type (E–H) and *aln<sup>224</sup>* mutant (I–L) transgenic embryos. In wild-type embryos, eGFP expression colocalizes with Sox10 protein expression (NC cells, indicated by arrowheads) (F–H). In contrast, all migrating GFP<sup>+</sup> cells (arrowheads) in the trunk of *aln<sup>224</sup>* mutant embryos do not express Sox10 (J–L). (M–P) Lateral views with anterior towards the left of 72 hpf wild-type (M,O) and low dose *paf1* MO-injected (N,P) *Tg(phox2bb:GFP)* embryos. GFP-expressing enteric neurons (arrow) are present in the gut of wild-type embryos (M) and are completely absent (arrow) in embryos with reduced *paf1* function (P). GFP<sup>+</sup> cells in *paf1* MO-injected embryos are likely sympathetic neurons. (Q–T) Lateral views with anterior towards the left of 72 hpf wild-type (Q,S) and low dose *paf1* MO-injected (R,T) *Tg(isl2b:GFP)* embryos. Reduction of *paf1* function diminishes melanophore formation, and results in cardiac edema and loss of jaw structures (arrowheads) in MO-injected embryos (R) when compared with wild-type embryos (Q). GFP fluorescence marking DRG cells (arrowheads) in wild-type (S) and *paf1* MO-injected embryos (T). DRG cell formation in *paf1* MO-injected embryos is significantly reduced (T).

initial streams of migrating PGCs arrest mid-axis and form two bilateral clusters of cells evident at 12 hpf (Fig. 5K). In *aln<sup>224</sup>* mutants of the same stage, PGCs are found scattered along the anteroposterior axis (Fig. 5L). Subsequently, in 30 hpf embryos, wild-type PGCs normally coalesce at the midline above the anterior portion of the yolk extension (Fig. 5M). In dramatic contrast, upon loss of zygotic *paf1* function, PGCs wander into numerous ectopic locales, including the brain and throughout the trunk and tail (Fig. 5N). In other experiments aimed at generating maternal-zygotic *paf1* mutants, we found homozygous *aln<sup>224</sup>* mutant PGCs did not survive and develop when transplanted into wild-type hosts (data not shown). In all, these experiments are consistent with the hypothesis that Paf1C is required to maintain proper PGC behavior and identity.

#### All Paf1C components are required for NC development

The protein product of *aln/paf1* is but one of five components of the vertebrate Paf1C – a cohort of proteins, Paf1, Ctr9, Cdc73, Rtf1 and Leo1, recruited to cooperate with RNA Pol II and facilitate transcription (Jaehning, 2010; Mueller and Jaehning, 2002; Squazzo et al., 2002; Van Oss et al., 2017). Previous work showed members of the Paf1C were required in some way for NC development, as mutations in *leo1* or *rtf1*, or inhibition of *ctr9* function by MO knockdown, disrupted formation of NC-derived tissues (Akanuma et al., 2007; Nguyen et al., 2010). We hypothesized the entire intact Paf1C was required to maintain the premigratory NC. We characterized early stages of NC development of two existing Paf1C mutants known to have NC defects, *leo1<sup>LA1186</sup>* and *rtf1<sup>kt641</sup>*, and one mutant, *cdc73/sunrise*, which had been analyzed previously only in the context of its role in erythroid development (Bai et al., 2010). In addition, we characterized the consequences of *ctr9* loss of function after we isolated an ENU-induced null mutation (*zy13*) in the *ctr9* gene (p.Trp580X) (Fig. S5). Similar to other Paf1C genes, *ctr9* is normally ubiquitously expressed during development and is refined to the anterior neural tissue by 24 hpf (Fig. S5). However, in *ctr9<sup>zy13</sup>* homozygous mutants, *ctr9* transcripts are undetectable by early somite stages, indicating it is a null allele (Fig. S5).

Embryos lacking any member of the Paf1C closely resemble the *aln* mutant phenotype (Fig. 6). Expression of markers of NC

development of additional progenitor cell types in *aln* mutant embryos. Primitive blood progenitors are first detected in the lateral mesoderm at 10–12 hpf and are marked by expression of *myb* and *tall*. Blood progenitors appear to arise normally in *aln<sup>224</sup>* mutant embryos, as expression of *myb* and *tall* in both the anterior and posterior lateral mesoderm are unaffected in 12 hpf *aln<sup>224</sup>* mutant embryos (Fig. 5A–D). However, by 26 hpf, the levels of expression of *myb* and *tall* in the intermediate cell mass are significantly downregulated in *aln<sup>224</sup>* mutant embryos compared with controls (Fig. 5E–H), consistent with the interpretation that Paf1 is needed to maintain development of the erythroid lineage.

The dependence of primordial germ cell (PGC) development on Paf1 function was measured in transgenic embryos that express GFP specifically in PGCs under the control of the *askopos* promoter (Blaser et al., 2005). Although PGCs arise normally in 5–6 hpf *aln<sup>224</sup>* mutants (Fig. 5I,J), they behave abnormally during subsequent development. During wild-type development, the

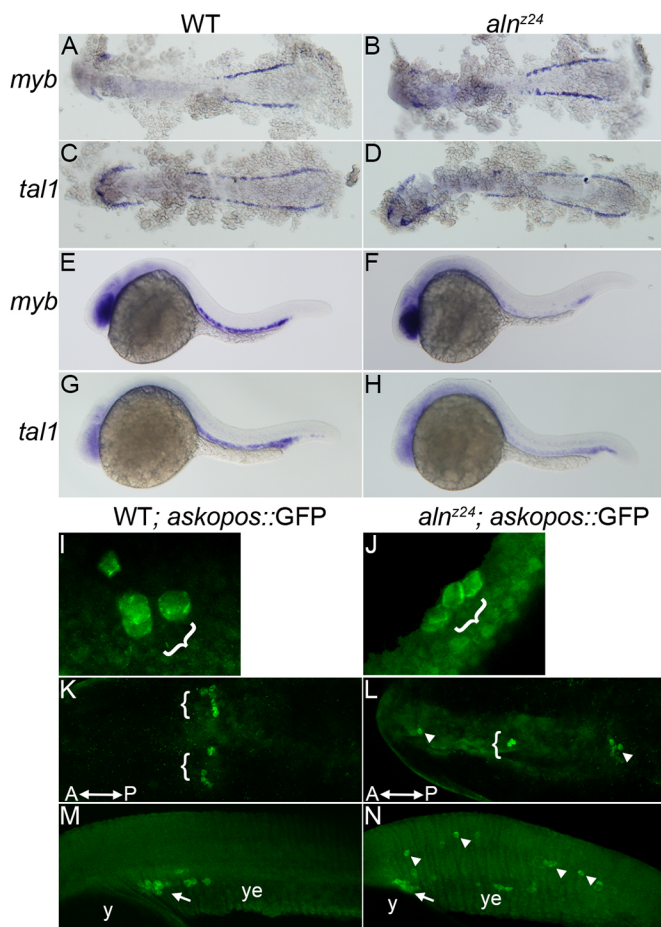

**Fig. 5. Paf1 is necessary for maintenance of blood and germline stem cell populations.** (A-D) Expression of *myb* (A,B) or *tal1* (C,D), markers of early blood precursors in the anterior and posterior lateral mesoderm at 12 hpf, is similar in *aln<sup>z24</sup>* mutant and wild-type sibling embryos. (E-H) In contrast, by 26 hpf, expression of *myb* (E,F) and *tal1* (G,H) in the intermediate cell mass is significantly reduced in *aln<sup>z24</sup>* mutant embryos. (I-N) Wild-type sibling and *aln<sup>z24</sup>; askopos::GFP* transgenic embryos that express GFP in PGCs. Small clusters of PGCs arise similarly in wild-type and *aln<sup>z24</sup>* mutant 50-60% epiboly embryos (I,J). PGCs are present in two bilateral clusters at 12 hpf (K) and coalesce at the midline above the yolk extension in 32 hpf (M) wild-type sibling embryos. In contrast, PGCs are present in ectopic locations in 12 hpf (L) and 32 hpf (N) *aln<sup>z24</sup>* mutant embryos. Brackets and arrows indicate normal clusters of PGCs, whereas arrowheads indicate ectopic PGCs. y, yolk; ye, yolk extension. A-D,K,L are dorsal views with anterior towards the left; E-H,M,N, are lateral views with anterior towards the left; I,J are dorsolateral views with animal pole upwards.

induction and early specification, such as *msx1b* and *tfap2a*, appear unaffected in 12-12.5 hpf Paf1C mutant embryos. However, the Paf1C mutant embryos fail to maintain normal expression levels of *foxd3* and *snailb* in the trunk of 16-18 hpf embryos, indicating premigratory NC is not properly maintained. Despite differences in the absolute numbers of NC cells at 16-18 hpf in the different mutants, by 24 hpf all Paf1C mutant embryos are devoid of *crestin* expression with the exception of *leo1<sup>LA1186</sup>* mutants, which have a few *crestin*-positive cells in the trunk. Each member of the Paf1C is needed to maintain the premigratory trunk NC population.

Components of the Paf1C are non-redundant. For example, overexpression of *Leo1* could not rescue the *aln<sup>z24</sup>* mutant phenotype, and overexpression of Paf1 could not rescue the *cdc73* mutant phenotype (data not shown). We found that knockdown of either *Ctr9* or *Rtf1* function results in a significant reduction of Paf1 protein expression at 16-18 hpf (Fig. S6). Thus, it appears

individual components are required for the stability of the entire Paf1C, explaining why loss of component genes have similar mutant phenotypes. We surmise the previously reported NC defects in these mutants arise from the cell-autonomous requirement for Paf1C function in developing NC cells.

### The antagonistic functions of P-TEFb and Paf1C regulate NC progenitor development

Paf1C is thought to function as a scaffold, or 'platform', necessary for the recruitment of additional transcription factors and enzymes needed to modulate many aspects of transcription (Jaehning, 2010; Van Oss et al., 2017). To identify the Paf1C-associated pathway needed to maintain the NC progenitor population, we sought to identify factors that execute this Paf1C function and thus whose loss might recapitulate the *aln* mutant phenotype, or opposing factors whose depletion might rescue melanophore development in *aln<sup>z24</sup>* mutant embryos. We used MO knockdown to determine the effects of eliminating expression of individual proteins known to interact with the Paf1C (Costa and Arndt, 2000; Jaehning, 2010; Ng et al., 2003; Rozenblatt-Rosen et al., 2009; Squazzo et al., 2002). Knockdown of *Rad6a* and *Rad6b*, E2 ubiquitin-conjugating enzymes required for histone H2B ubiquitylation, *CstF3*, a factor needed for 3' end processing, or *Spt16*, a histone chaperone subunit of the FACT complex that facilitates transcription progression by destabilizing nucleosome structure, failed either to block pigment cell development in wild-type embryos or to rescue melanophore formation in *aln<sup>z24</sup>* mutant embryos (Fig. S7). In contrast, knockdown of *Cdk9*, the kinase subunit of P-TEFb whose phosphorylation activity triggers release of paused RNA Pol II (Peterlin and Price, 2006), was able to rescue melanophore formation in all MO-injected *aln<sup>z24</sup>* mutant embryos ( $n=58$ ) (Fig. S7). These data demonstrate that among the potential roles of Paf1C, it is its function in opposing P-TEFb that is needed to maintain the NC progenitor population.

To further explore *cdk9* function in NC development, we generated a *cdk9* null allele, *cdk9<sup>z26</sup>* (see Materials and Methods). As *cdk9* transcripts are supplied maternally (data not shown), the *cdk9*-null phenotype reflects requirements for the zygotic product. Consistent with the results of *Cdk9* knockdown, loss of *cdk9* function had a strong effect on NC development (Fig. 7). First, *aln<sup>z24</sup>; cdk9<sup>z26</sup>* double mutant embryos displayed significant rescue of NC and melanophore development (Fig. 7B,D), indicating that loss of P-TEFb counteracted the effects of loss of the Paf1C on NC progenitors. Second, *cdk9<sup>z26</sup>* mutant embryos developed a superabundance of NC, with an evident excess of melanophores in the head of 48 hpf mutant embryos (Fig. 7A,C). Loss of *cdk9* also produced expansion of the streams of *crestin<sup>+</sup>* and *sox10<sup>+</sup>* migrating NC precursor population, with *crestin*-expressing cells infiltrating the neural tube (Fig. 7E-H). Hence, loss of Paf1C and loss of *Cdk9* have reciprocal effects on the NC progenitor population, and the role of Paf1C in maintaining NC progenitors is counteracted by the pause release and/or transcription elongation promoted by P-TEFb.

## DISCUSSION

### Paf1C is required to maintain NC progenitors

Loss of any of the five genes that encode Paf1C components results in the short-lived development of NC progenitors and the failure of these cells to give rise to NC-derived tissues in the trunk of the zebrafish embryo. By detailed examination of NC lineage development, we found the cascade of gene expression events associated with induction and generation of NC progenitors occurred with normal spatiotemporal characteristics in mutant embryos.

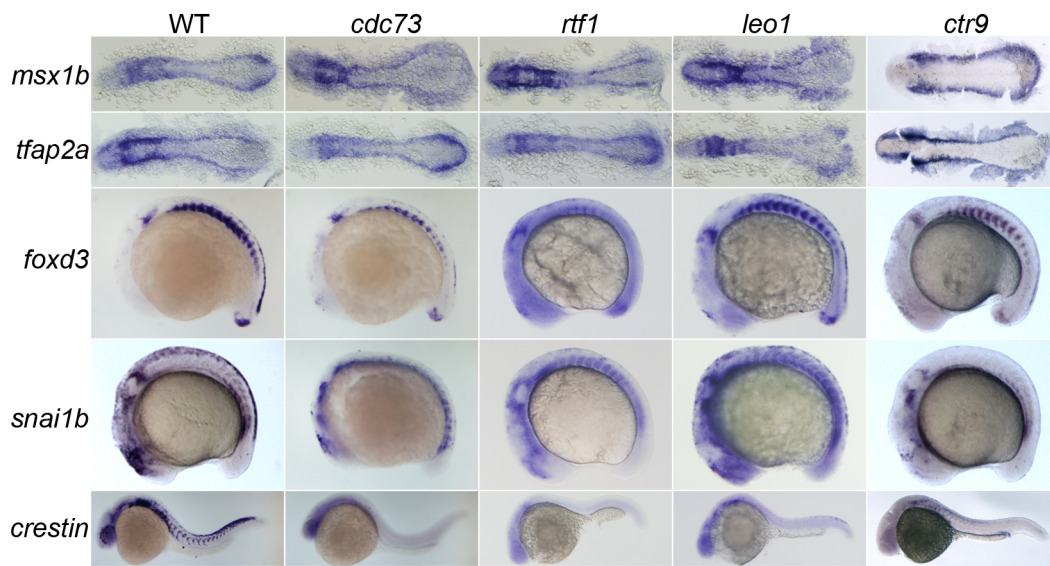

**Fig. 6. All members of the Paf1C are needed for maintenance of the trunk premigratory NC.** Gene expression in 12–12.5 hpf (*msx1b* and *tfap2a*), 16–18 hpf (*foxd3* and *snai1b*) and 24 hpf (*crestin*) wild-type, *cdc73/sunrise*, *rtf1<sup>kt641</sup>*, *leo1<sup>LA1186</sup>* and *ctr9<sup>zy13</sup>* mutant embryos. Expression of *msx1b* and *tfap2a*, which mark the NC precursor domain and NC lineage, respectively, is not altered in Paf1C mutant embryos, while expression of *foxd3* and *snai1b*, which mark the premigratory NC, is severely reduced or absent in the trunk of all Paf1C mutant embryos. Paf1C mutant embryos are devoid of *crestin*-positive cells, except *leo1<sup>LA1186</sup>* mutants, which have a few *crestin*-positive cells in the trunk. *msx1b*- and *tfap2a*-stained embryos are shown as dorsal views with anterior to the left. *foxd3*-, *snai1b*- and *crestin*-stained embryos are lateral views with anterior towards the left.

Lineage tracing indicated that premigratory NC cells failed to maintain expression of the definitive NC marker *sox10* and lost their normal developmental identity without immediately dying. Owing to the presence of maternally supplied Paf1 protein and *paf1* mRNA deposited in eggs, it is likely the phenotypic changes we observe in the null mutants represent a tapering off of essential functions provided to

NC cells, rather than a complete abrogation of Paf1C functions. Maternal supply may also explain different zygotic requirements for *paf1* in cranial versus trunk neural crest. As a reflection of their waning specified precursor fate, mutant NC progenitors migrated a few cell diameters from their source, failing to populate their normal destinations or to translocate and join adjacent tissues.

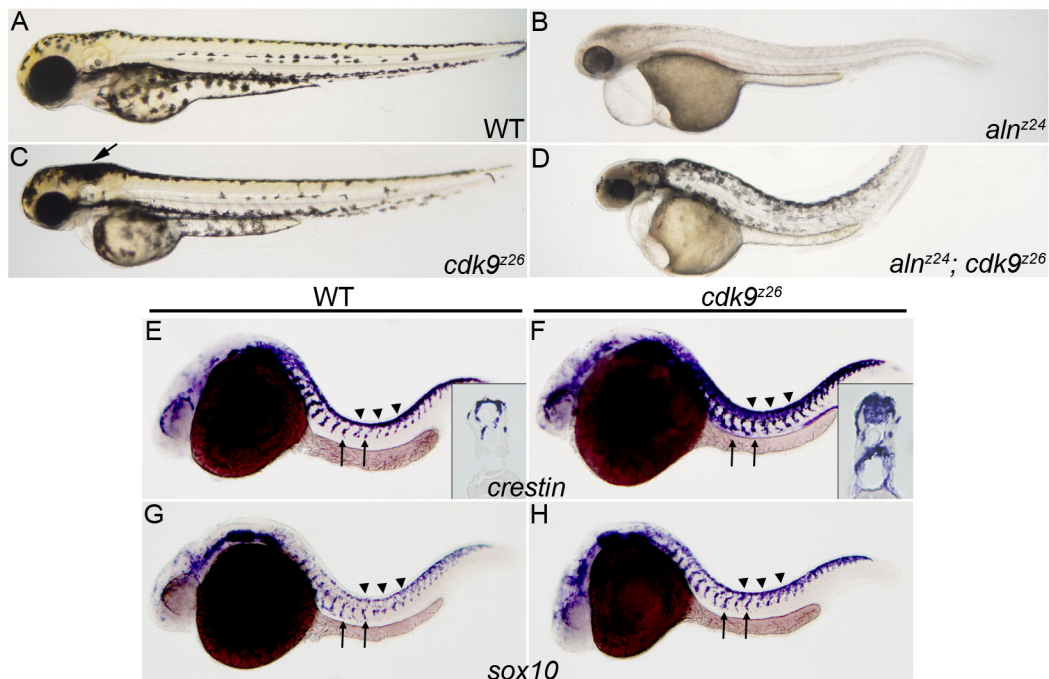

**Fig. 7. Loss of Cdk9 function expands both the premigratory and migratory NC populations, and suppresses loss of melanophore formation in *aln/paf1* mutants.** (A–D) Lateral views of 48 hpf wild-type (A), *aln<sup>z24</sup>* mutant (B), *cdk9<sup>z26</sup>* mutant (C) or *aln<sup>z24</sup>; cdk9<sup>z26</sup>* double mutant embryos (D). (E–H) NC expression of *crestin* (E,F) and *sox10* (G,H) in 26 hpf wild-type and *cdk9<sup>z26</sup>* mutant embryos. Arrow in C indicates an increase in the number of melanophores in the head of *cdk9<sup>z26</sup>* mutant embryos. Insets in E and F are cross-sections through the trunk of *crestin*-expressing embryos. Arrows indicate migrating NC and arrowheads indicate premigratory NC.

Our studies reveal a unique role for Paf1C that has been previously unrecognized in NC development. Loss of the complex results in a novel defect: the failure to maintain established progenitors. Paf1C is required in NC cells, as expression of *paf1* solely in the NC was sufficient to rescue NC development in *aln* mutants. The inability to maintain the progenitor population is distinct from any function predicted by gene regulatory network models that describe pathways controlling the progressive development of the NC lineage (Simoes-Costa and Bronner, 2015). It is likely the Paf1C has a permissive role as part of the machinery required to support maintenance of the progenitor state rather than an instructive one designating a particular fate. It seems unlikely that many additional genes can be mutated to uncover this function, as independent forward genetic screens repeatedly found that loss of Paf1C components was responsible for the inhibition of the development of premigratory NC in mutants.

### **Paf1C and P-TEFb functions are common requirements for maintenance of tissue precursors**

Whereas our data highlight the important antagonistic relationship between the Paf1C and P-TEFb in maintaining multipotent cells of the NC lineage, the interacting functions of the two complexes may be essential for regulating pluripotent precursor cells in general. Two additional stem cell-like populations, primordial germ cells and erythroid progenitors, were affected in the *aln/paf1* mutant embryos. In each instance, progenitor cells appeared to arise transiently, but the normal behavior of the precursors was not completed. We hypothesize that differences in the requirements for the maternally supplied Paf1 protein accounted for the variations in the progenitor phenotypes caused by loss of zygotic *paf1* gene expression. Owing to our inability to completely deplete embryos of maternally supplied protein, we could not determine whether Paf1C might be required in additional pluripotent cells in the early zebrafish embryo.

Previous studies have linked the two transcription complexes to the behavior of specific precursor populations. In the zebrafish spinal cord, oligodendrocyte differentiation from an established precursor population is dependent on antagonistic Paf1C/P-TEFb interactions (Kim et al., 2012). Paf1C function has been previously associated with maintenance of a multipotent progenitor state. Paf1C is required for maintenance of embryonic stem cells (ESCs) *in vitro*, and its forced overexpression blocks their differentiation (Ding et al., 2009; Ponnusamy et al., 2009; Strikoudis et al., 2016). Forced expression of the complex also appears to stabilize the undifferentiated state of certain primitive hematopoietic cells (Muntean et al., 2010). Reciprocally, the function of P-TEFb, i.e. release of promoter-proximal paused Pol II, is required for ESC differentiation (Tastemel et al., 2017). In summary, the Paf1C and P-TEFb have been associated recurrently with maintenance functions in several pluripotent precursor populations.

### **Paf1C may contribute to transcription pausing in progenitor cells**

To test whether loss of pausing might be responsible for loss of NC progenitors, we asked whether loss of P-TEFb activity, the crucial factor involved in promoting pause-release and transcription elongation (Li et al., 2018; Lu et al., 2016; Peterlin and Price, 2006; Zhou et al., 2012), might counteract the effects of loss of Paf1. Indeed null mutations in *cdk9*, the gene encoding the catalytic subunit of P-TEFb, strongly rescued NC progenitor fate in *aln/paf1* mutants. Double mutants produced streams of crestin-expressing migrating NC cells and normal-appearing terminally differentiated melanophores, neither of which were evident in the *aln/paf1* mutant.

Moreover, loss of Cdk9 in zygotic *cdk9<sup>z26</sup>* mutant embryos led to a superabundance of NC, results that are consistent with the interpretation that inhibiting or delaying pause release is associated with maintenance of the NC progenitor state. Cdk9 was the only Paf1C-interacting factor whose loss suppressed the NC phenotype *aln* mutant embryos, indicating that pause-release is a crucial function in maintaining the NC progenitor population.

As a result of the antagonistic roles that P-TEFb and the Paf1C have in maintaining the NC progenitor population, we hypothesize that Paf1C is required to achieve transcription pausing. Consistent with this interpretation, the null *joggy/spt5<sup>sk8</sup>* mutant, which is deficient in a component required for transcription pausing, has a phenotype similar to the Paf1C mutants (Keegan et al., 2002; White et al., 2011). Other studies that linked Paf1C to maintenance of tissue precursor populations also indicated that Paf1C functioned to curtail transcription elongation. Paf1C mutations were found to suppress the phenotype of the zebrafish *moonshine (trim33)* blood mutant, which lacks TIF1 $\gamma$ , a factor that promotes transcription elongation in erythroid progenitors (Bai et al., 2010). In those studies, loss of any member of the Paf1C had effects similar to the *spt5<sup>sm806</sup>* mutation, affecting a factor known to be required for RNA Pol II pausing (Guo et al., 2000). It has also been demonstrated that disrupting RNA Pol II pausing reduces hematopoietic stem cells in zebrafish and this defect can be rescued by inhibiting P-TEFb function (Yang et al., 2016). Finally, in tissue culture cells, loss of Paf1 function has been linked to a release of proximal-promoter paused RNA Pol II and its progression onto gene bodies at many loci (Chen et al., 2015), and enhancer-bound Paf1 prevents the release of proximal-promoter paused RNA Pol II (Chen et al., 2017).

Nevertheless, we recognize that the role of Paf1C in maintaining promoter-proximal paused RNA Pol II is controversial (Hou et al., 2019; Vos et al., 2018a,b). Several studies have demonstrated that Paf1C helps promote CTD phosphorylation of paused RNA Pol II and its release into productive elongation (Vos et al., 2018a; Yu et al., 2015) and that Paf1C is a positive modulator of RNA Pol II elongation rate *in vitro* (Hou et al., 2019). Paf1C functions in transcription termination and processing are also well established (Nordick et al., 2008; Penheiter et al., 2005). Together, these data suggest that the primary function of Paf1C may depend on cell- and tissue-specific factors that interact with Paf1C to modulate its effect on RNA Pol II transcription (Van Oss et al., 2017).

The essential roles of Paf1C and P-TEFb in regulating transcription and their likely pleiotropic roles in development make it difficult to associate these factors with specific developmental events or states. We imagine that knowledge of the specific cells in which Paf1C or P-TEFb function are perturbed experimentally will be crucial to the interpretation of the consequences of the effects. Recent studies found that P-TEFb is required for NC specification in *Xenopus* embryos as a consequence of its role in the release of paused *Myc* transcription (Hatch et al., 2016). Expression of *Myc* was shown previously to be needed for early stages of NC development (Bellmeyer et al., 2003). At first glance these results might appear to contradict the current work indicating that P-TEFb promotes pause release in NC progenitors leading to their differentiation. The disparity likely arises in the different experimental approaches used to analyze the developmental functions of Cdk9. Hatch et al. used translation-blocking morpholinos, which can inhibit the functions of maternally supplied as well as zygotically expressed transcripts, to knockdown *Cdk9* function in *Xenopus* embryos. Their studies likely uncovered the earliest role of pause release in NC development. In contrast, the present studies examined zygotic *cdk9* and *aln/paf1*



mutants, in which maternal products are available to support early development. P-TEFb likely supplies distinct temporal functions that are required to support different stages of NC development: its function may be required early for *Myc* expression and NC specification, while later promoting the expression of differentiation genes. In conclusion, direct examination of RNA Pol II occupancy and transcript production in tissue progenitors will be required to definitively test the role of transcription pausing in regulating pluripotency and cell differentiation.

## MATERIALS AND METHODS

### Zebrafish strains

Zebrafish (*Danio rerio*) were maintained and all experiments were performed in accordance with approved institutional protocols at the University of Utah (IACUC). Adult zebrafish were maintained under standard conditions (Westerfield, 2000) and kept on a light-dark cycle of 14 h in light and 10 h in dark at 27°C. AB and Tu strains were used as wild-type zebrafish. The previously described *aln<sup>z12</sup>* mutation (Cretekos and Grunwald, 1999) is maintained on the AB background. The *c4* allele is a gamma ray-induced deletion on chromosome 15 (Fisher et al., 1997). The previously isolated Paf1C mutant lines used in this study were: *sunrise/cdc73* (Bai et al., 2010); *leo1<sup>LA1186</sup>* (Nguyen et al., 2010) and *rtfl<sup>kt641</sup>* (Akanuma et al., 2007). The *ctr9<sup>zy13</sup>* and *alyron<sup>z24</sup>* mutations isolated in this study were recovered from AB animals mutagenized with ENU as described previously (Mullins et al., 1994). The *ctr9<sup>zy13</sup>* mutation was recovered from a standard F2 screen and was maintained by outcrosses to wild-type WIK animals. The *alyron<sup>z24</sup>* mutation was recovered in a screen for mutations that failed to complement *alyron<sup>z12</sup>* and is maintained in the AB background. *cdk9<sup>z26</sup>* was induced by TALEN-mediated mutagenesis of Tu zebrafish and is maintained on the Tu background. The *sox10:egfp* (Park et al., 2005), *isl2b:GFP* (Pittman et al., 2008) and *phox2bb:GFP* (Nechiporuk et al., 2007) transgenes have been previously described.

### Zebrafish embryo culture

Embryos from natural spawnings were generated and collected as described previously (Westerfield, 2000). Live embryos were maintained at 28°C. All developmental staging was based on counting somite number and calculated based on somitogenesis beginning at 10 hpf, with the first six somites forming three per hour and all subsequent somites forming two per hour (18-somite stage is 18 hpf) (Kimmel et al., 1995).

### Molecular analysis of the z12 and c4 genomic regions

Genomic DNA (gDNA) was isolated from pools of *aln<sup>z12</sup>* mutant or wild-type sibling embryos. PCR amplification from the gDNA identified the following markers as absent from *aln<sup>z12</sup>* chromosomes: *z37*, *z1195*, *z13759*, *z27227*, *z24*, *z6190*, *z25713*, *z40966*, *z858*, *z846* and *z5223*, and the gene *gap-43* (Fig. S1). To define the *alyron* critical region, gDNA was isolated from *aln<sup>z12</sup>/c4* mutant and wild-type sibling 32 hpf embryos, and PCR amplification from the gDNA samples was used to determine marker sequences that were missing in transheterozygous genomes (Fig. S1). The critical region corresponds to ~1-2.5cM. Z-marker primer sequences can be obtained from the Zebrafish Information Network (zfin.org). *gap-43* primer sequences are: *gap-43* F, 5'-GAAGAGGCCGATCAGGAGATC-3'; *gap-43* R, 5'-GTTTCTGTGGAGGCGTCAGC-3'.

### Genotyping of *aln* mutant embryos

The genotypes of mutant embryos were determined by PCR analysis of gDNA isolated from individual embryos. Homozygous *aln<sup>z12</sup>* mutant embryos were identified by the absence of *gap-43* sequences. The *aln<sup>z24</sup>* C>A transversion at base pair 843 of the *paf1* coding sequence disrupts an NspI restriction endonuclease site present in the wild-type genome. To genotype *aln<sup>z24</sup>* embryos, the region of the *paf1* gene spanning the *aln<sup>z24</sup>* mutation was amplified from gDNA using the following primers: *paf1g* F, 5'-GTTTCAGAGGTATGATGGATGAGG-3' and *paf1g* R, 5'-GTATGCA GCTTTATGAAAACACTC-3'. The PCR product was digested with NspI (New England Biolabs) and resolved on a 2% agarose gel.

### Identification of *ctr9<sup>zy13</sup>*

The gene responsible for the *ctr9<sup>zy13</sup>* mutation was identified using a combination of restriction site-associated DNA sequencing (RADseq) mapping (Miller et al., 2007) and a candidate gene approach. Briefly, gDNA was prepared from pools of 70 mutant and 70 wild-type sibling embryos, and mapped by RADseq analysis (Florigenex). A region of ~10 Mb on LG 7 was identified as the probable site of the genetic lesion. Analysis of the Ensemble zebrafish Zv8 assembly revealed the candidate region included *ctr9*, a gene encoding a component of the Paf1C. A homozygous G-to-A nucleotide substitution was detected in mutant gDNA. The mutation changes a tryptophan (W) residue at amino acid position 580 to a stop codon; the wild-type Ctr9 protein is 1160 amino acids.

### Cdk9 mutant generation

TALENs were generated to exon 2 of the *cdk9* coding sequence (NM\_212591) and injected into Tu embryos, and an 11 bp deletion that removes nucleotides 144-154 of the coding sequence was recovered (Dahlem et al., 2012). The *cdk9<sup>z26</sup>* mutation results in a premature stop codon; no Cdk9 protein is detectable in 26 hpf mutant protein extracts by immunoblot using a zebrafish-specific Cdk9 antibody (GeneTex #zf124698) (data not shown).

### Cloning and analysis of zebrafish *paf1* and *ctr9* sequences

The zebrafish *paf1* cDNA (NM\_001024453) and *ctr9* cDNA (NM\_001083583) sequences were used to generate primers to amplify full-length cDNA from wild-type and mutant embryos. Primers *paf1* F (5'-TCCTCCATGGCTCCTACCATAC-3') and *paf1* R (5'-GTGAACTA TGCCTCTGCAGGAGC-3') or *ctr9* F (5'-GCTGCTGTTTCATCACC ACTG-3') and *ctr9* R (5'-CAGGGTGTGTTGTTCCCTT-3') were used to PCR amplify coding sequences, which were cloned into pGEM-T Easy (Promega) or pCRII (Invitrogen), sequence verified, and subcloned into the pCS2<sup>+</sup> vector for generation of full-length wild-type and mutant mRNAs and antisense probes.

### Immunoblot analysis

Protein extracts were prepared as previously described (Jurynek and Grunwald, 2010) from groups of 30 *aln<sup>z12</sup>* mutant, *aln<sup>z24</sup>* mutant or wild-type sibling embryos harvested at 36 hpf or groups of 30 wild-type control, *ctr9* MO-injected or *rtfl* MO-injected embryos harvested at 16-18 hpf. Protein was prepared as described (Link et al., 2006) from unfertilized eggs collected from adult females. Total lysate (25 µg) was resolved by electrophoresis through 4-20% polyacrylamide gradient gels (NuSep). Blots of the gels were probed with α-pMAPK (1:10,000; SAB4504395, Sigma) or α-Paf1 (1:6500; #A300-173A, Bethyl Laboratories). Secondary antibodies were HRP-linked goat anti-mouse (1:10,000, Jackson ImmunoResearch, 115-035-174) and HRP-linked goat anti-rabbit (1:10,000, Jackson ImmunoResearch, 111-035-144). Signal was developed following incubation with ECL Plus (GE Healthcare).

### Morpholino oligonucleotide injections

An antisense splice-blocking morpholino oligonucleotide targeting the *paf1* exon 1 splice donor site was synthesized (Gene Tools): *paf1* SB MO 5'-TATTATGGTTTATTCCTCTCTCACCGG-3'. Approximately 1 nl (4 ng) morpholino was injected into the yolk of one-cell stage wild-type embryos. *paf1* SB MO is highly effective at blocking *paf1* expression: RT-PCR and sequence analyses of *paf1* cDNA from *paf1* SB MO-injected embryos detected only unspliced RNA containing intron 1; intron inclusion introduced premature stop codons in all three open reading frames. To generate embryos with reduced Paf1 function that are viable at 72 hpf for analysis of DRG and enteric neuron formation (Fig. 4M-T), 1 ng of *paf1* SB MO was injected into the yolk of one-cell stage embryos. Additional antisense MOs were used as previously described (Bai et al., 2010): *cdk9*, *rtfl*, *spt16*, *cstF3*, *rad6a* and *rad6b*. Fixed *tfap2a* and *tfap2c* MO-injected and control embryos were kindly provided by Rob Cornell (University of Iowa, Iowa City, IA, USA).

### mRNA and DNA injections

Full-length wild-type and mutant *paf1*, wild-type and mutant *ctr9*, and *snai1b* and *foxd3* mRNAs were made using the AmpliCap SP6 High Yield Message Maker Kit (Epicentre Biotechnologies). Approximately 200 pg

*paf1* mRNA and 50–100 pg *ctr9* RNA were injected into one-cell stage embryos. Embryos were scored for the presence or absence of melanophores at 36–48 hpf. Injected embryos were genotyped by PCR. The 6.5 kb *msx1b* promoter upstream of the translational start site was isolated from a PAC (182o13-BUSM1 PAC library) following restriction digestion and cloned into pBluescript SK. The 6.5 kb promoter corresponds approximately to bp 49,852,799–49,859,299 on LG 1 (Ensemble zebrafish Zv9 assembly). cDNA sequences encoding eGFP, Paf1 or Sox10 were cloned downstream of the promoter. DNA constructs (50 pg) containing *msx1b::GFP*, *msx1b::paf1* or *msx1b::sox10* were injected into one-cell stage *z24* intercross embryos, and embryos were scored for presence of melanophores at 48 hpf. Anti-GFP antibodies (1:1000, Thermo Fisher Scientific, A-11122) were used to detect mosaic GFP expression (Juryneć et al., 2008) at 11.5 hpf in embryos injected with *msx1b::GFP* DNA; anti-Sox10 antibody (1:1000) (a gift from B. Appel, University of Colorado School of Medicine, USA) was used as described by Park et al. (2005).

### Immunohistochemistry and *in situ* hybridization

Embryos were fixed with fresh 4% paraformaldehyde in PBS at room temperature for 2 h or overnight at 4°C. Fixed embryos were dehydrated in methanol and stored at –20°C until processing for immunohistochemistry according to standard procedures (Westerfield, 2000). In brief, embryos were rehydrated into Ptw (PBS with 0.1% Tween-20) and then incubated in blocking agent (10% heat-inactivated sheep serum, 1% DMSO, 2 mg/ml BSA and 0.1% Triton X-100 in PBS) for at least 1 h at room temperature. Embryos were incubated in primary antibodies diluted in blocking agent overnight at 4°C. Primary antibodies were removed and embryos were washed extensively with PBDBT (2 mg/ml BSA, 0.1% TritonX-100 and 1% DMSO in PBS). Embryos were next incubated with appropriate secondary antibodies in the dark for either 2 h at room temperature or overnight at 4°C followed by extensive washes in PBDBT. Primary antibodies used were: anti-pMAPK (1:10,000; SAB4504395, Sigma), anti-Paf1 (1:6500; #A300-173A, Bethyl Laboratories), anti-GFP (1:1000, A-11122, ThermoFisher), anti-Cdk9 (1:1000, GeneTex, zfl24698) and anti-Sox10 antibody (1:1000; a gift from B. Appel). Secondary antibodies used were donkey anti-mouse IgG-488 at 1:500 (Jackson ImmunoResearch, 715-545-151), or goat anti-rabbit IgG-594 at 1:500 (Jackson ImmunoResearch, 111-585-144). DAPI was used at 1:10,000 as a nuclear counterstain. Embryos were taken stepwise through a glycerol series into 75% glycerol. All fluorescence images comparing wild-type and *aln<sup>z24</sup>* mutant embryos or wild-type and *paf1* SB MO-injected embryos were captured using identical settings.

Whole-mount *in situ* hybridization was performed on embryos fixed overnight at 4°C in 4% paraformaldehyde, washed in Ptw, dehydrated stepwise into 100% methanol and maintained at –20°C until processing. Riboprobe hybridization with digoxigenin (DIG; Roche)-labeled riboprobes followed standard procedures (Juryneć et al., 2008). Embryos were rehydrated into Ptw and treated with 5 µg/ml proteinase K in Ptw for 2 min and 0.1 M triethanolamine (TEA) in Ptw twice for 5 min. Acetic anhydride was added to the TEA mixture and embryos were refixed in 3.7% formaldehyde in Ptw for 20 min followed by thorough washing. Embryos were incubated in hybridization buffer (70% formamide, 5× SSC, 1 mg/ml yeast RNA, 100 µg/ml heparin, 1× Denhardt's, 0.1% Tween-20, 5 mM EDTA) at 70°C for a minimum of 16 h followed by incubation in probe (1 ng/µl) in hybridization buffer at 70°C for 1–2 days. After a series of washes and incubation with anti-digoxigenin-AP overnight, embryos were developed in NBT/BCIP (Roche) to detect alkaline phosphatase. Probes for the following genes were used for *in situ* hybridization: *crestin*, *msx1b*, *sox10*, *myb*, *tfap2a*, *foxd3*, *snai1b*, *paf1*, *sox2*, *dlx3b* and *ctr9*. Embryos were mounted in 75% glycerol. Transverse sections approximately one somite thick were collected manually using a razor blade.

### Acknowledgements

This work is dedicated to our friend Chris J. Cretekos (1966–2014), who had the insight to generate and characterize the *alyn<sup>z12</sup>* mutant. Rob Cornell generously provided *tfap2a/c* MO-depleted embryos for analysis and Bruce Appel generously provided the Sox10 antibody. We thank our colleagues Chi-Bin Chien, Rich Dorsky and Rod Stewart for scientific guidance and critical feedback. We thank the

University of Utah Health Sciences Core Facilities for DNA sequencing, oligonucleotide synthesis, imaging support and zebrafish husbandry.

### Competing interests

The authors declare no competing or financial interests.

### Author contributions

Conceptualization: M.J.J., D.J.G.; Methodology: M.J.J.; Validation: M.J.J.; Formal analysis: M.J.J., B.W.B., H.J., R.A.S.P., H.J.Y., D.J.G.; Investigation: M.J.J., B.W.B., H.J., R.A.S.P., H.A.G., Y.-C.S., K.H., D.J.G.; Resources: X.B., A.N., L.I.Z.; Writing – original draft: M.J.J., B.W.B., H.J.Y., D.J.G.; Writing – review & editing: M.J.J., X.B., B.W.B., H.J.Y., L.I.Z., D.J.G.; Visualization: M.J.J., B.W.B.; Supervision: D.J.G.; Project administration: D.J.G.; Funding acquisition: D.J.G.

### Funding

This work was supported by grants to D.J.G. from the National Institutes of Health (NIH) (1P01HD048886 and 1R01HD081950); to L.I.Z. from the Melanoma Research Alliance and the NIH (PO1 CA163222); and to H.J.Y. from the NIH (UM1 HL098160). We acknowledge direct financial support for the research reported in this publication from the Huntsman Cancer Foundation and the Nuclear Control of Cell Growth and Differentiation Program at the Huntsman Cancer Institute. We also acknowledge support from the National Cancer Institute/National Institutes of Health (P30CA042014). Deposited in PMC for release after 12 months.

### Supplementary information

Supplementary information available online at <http://dev.biologists.org/lookup/doi/10.1242/dev.180133.supplemental>

### References

- Adelman, K. and Lis, J. T. (2012). Promoter-proximal pausing of RNA polymerase II: emerging roles in metazoans. *Nat. Rev. Genet.* **13**, 720–731. doi:10.1038/nrg3293
- Adelman, K., Kennedy, M. A., Nechaev, S., Gilchrist, D. A., Muse, G. W., Chinenov, Y. and Rogatsky, I. (2009). Immediate mediators of the inflammatory response are poised for gene activation through RNA polymerase II stalling. *Proc. Natl. Acad. Sci. USA* **106**, 18207–18212. doi:10.1073/pnas.0910177106
- Akanuma, T., Koshida, S., Kawamura, A., Kishimoto, Y. and Takada, S. (2007). Paf1 complex homologues are required for Notch-regulated transcription during somite segmentation. *EMBO Rep.* **8**, 858–863. doi:10.1038/sj.embor.7401045
- Arduini, B. L., Bosse, K. M. and Henion, P. D. (2009). Genetic ablation of neural crest cell diversification. *Development* **136**, 1987–1994. doi:10.1242/dev.033209
- Bahrapour, S. and Thor, S. (2016). Ctr9, a key component of the Paf1 complex, affects proliferation and terminal differentiation in the developing Drosophila nervous system. *G3* **6**, 3229–3239. doi:10.1534/g3.116.034231
- Bai, X., Kim, J., Yang, Z., Juryneć, M. J., Akie, T. E., Lee, J., LeBlanc, J., Sessa, A., Jiang, H., DiBiase, A. et al. (2010). TIF1gamma controls erythroid cell fate by regulating transcription elongation. *Cell* **142**, 133–143. doi:10.1016/j.cell.2010.05.028
- Bellmeyer, A., Krase, J., Lindgren, J. and LaBonne, C. (2003). The protooncogene *c-myc* is an essential regulator of neural crest formation in xenopus. *Dev. Cell* **4**, 827–839. doi:10.1016/S1534-5807(03)00160-6
- Blaser, H., Eisenbeiss, S., Neumann, M., Reichman-Fried, M., Thisse, B., Thisse, C. and Raz, E. (2005). Transition from non-motile behaviour to directed migration during early PGC development in zebrafish. *J. Cell Sci.* **118**, 4027–4038. doi:10.1242/jcs.02522
- Boettiger, A. N. and Levine, M. (2009). Synchronous and stochastic patterns of gene activation in the Drosophila embryo. *Science* **325**, 471–473. doi:10.1126/science.1173976
- Bronner, M. E. and Simões-Costa, M. (2016). The neural crest migrating into the twenty-first century. *Curr. Top. Dev. Biol.* **116**, 115–134. doi:10.1016/bs.ctdb.2015.12.003
- Chen, Y., Yamaguchi, Y., Tsugeno, Y., Yamamoto, J., Yamada, T., Nakamura, M., Hisatake, K. and Handa, H. (2009). DSIF, the Paf1 complex, and Tat-SF1 have nonredundant, cooperative roles in RNA polymerase II elongation. *Genes Dev.* **23**, 2765–2777. doi:10.1101/gad.1834709
- Chen, F. X., Woodfin, A. R., Gardini, A., Rickels, R. A., Marshall, S. A., Smith, E. R., Shiekhattar, R. and Shilatifard, A. (2015). PAF1, a molecular regulator of promoter-proximal pausing by RNA polymerase II. *Cell* **162**, 1003–1015. doi:10.1016/j.cell.2015.07.042
- Chen, F. X., Xie, P., Collings, C. K., Cao, K., Aoi, Y., Marshall, S. A., Rendleman, E. J., Ugarenko, M., Ozark, P. A., Zhang, A. et al. (2017). PAF1 regulation of promoter-proximal pause release via enhancer activation. *Science* **357**, 1294–1298. doi:10.1126/science.aan3269
- Chen, F. X., Smith, E. R. and Shilatifard, A. (2018). Born to run: control of transcription elongation by RNA polymerase II. *Nat. Rev. Mol. Cell Biol.* **19**, 464–478. doi:10.1038/s41580-018-0010-5
- Costa, P. J. and Arndt, K. M. (2000). Synthetic lethal interactions suggest a role for the *Saccharomyces cerevisiae* Rtf1 protein in transcription elongation. *Genetics* **156**, 535–547.

- Cretekos, C. J. and Grunwald, D. J. (1999). alyron, an insertional mutation affecting early neural crest development in zebrafish. *Dev. Biol.* **210**, 322-338. doi:10.1006/dbio.1999.9287
- Dahlem, T. J., Hoshijima, K., Juryneć, M. J., Gunther, D., Starker, C. G., Locke, A. S., Weis, A. M., Voytas, D. F. and Grunwald, D. J. (2012). Simple methods for generating and detecting locus-specific mutations induced with TALENs in the zebrafish genome. *PLoS Genet.* **8**, e1002861. doi:10.1371/journal.pgen.1002861
- Ding, L., Paszkowski-Rogacz, M., Nitzsche, A., Slabicki, M. M., Heninger, A.-K., de Vries, I., Kittler, R., Junqueira, M., Shevchenko, A., Schulz, H. et al. (2009). A genome-scale RNAi screen for Oct4 modulators defines a role of the Paf1 complex for embryonic stem cell identity. *Cell Stem Cell* **4**, 403-415. doi:10.1016/j.stem.2009.03.009
- Fisher, S., Amacher, S. L. and Halpern, M. E. (1997). Loss of cerebium function ventralizes the zebrafish embryo. *Development* **124**, 1301-1311.
- Gaertner, B. and Zeitlinger, J. (2014). RNA polymerase II pausing during development. *Development* **141**, 1179-1183. doi:10.1242/dev.088492
- Gariglio, P., Bellard, M. and Chambon, P. (1981). Clustering of RNA polymerase B molecules in the 5' moiety of the adult beta-globin gene of hen erythrocytes. *Nucleic Acids Res.* **9**, 2589-2598. doi:10.1093/nar/9.11.2589
- Gerlach, J. M., Furrer, M., Gallant, M., Birkel, D., Baluapuri, A., Wolf, E. and Gallant, P. (2017). PAF1 complex component Leo1 helps recruit Drosophila Myc to promoters. *Proc. Natl. Acad. Sci. USA* **114**, E9224-E9232. doi:10.1073/pnas.1705816114
- Guo, S., Yamaguchi, Y., Schilbach, S., Wada, T., Lee, J., Goddard, A., French, D., Handa, H. and Rosenthal, A. (2000). A regulator of transcriptional elongation controls vertebrate neuronal development. *Nature* **408**, 366-369. doi:10.1038/35042590
- Hatch, V. L., Marin-Barba, M., Moxon, S., Ford, C. T., Ward, N. J., Tomlinson, M. L., Desanlis, I., Hendry, A. E., Hontelez, S., van Kruisbergen, I. et al. (2016). The positive transcriptional elongation factor (P-TEFb) is required for neural crest specification. *Dev. Biol.* **416**, 361-372. doi:10.1016/j.ydbio.2016.06.012
- Henriques, T., Gilchrist, D. A., Nechaev, S., Bern, M., Muse, G. W., Burkholder, A., Fargo, D. C. and Adelman, K. (2013). Stable pausing by RNA polymerase II provides an opportunity to target and integrate regulatory signals. *Mol. Cell* **52**, 517-528. doi:10.1016/j.molcel.2013.10.001
- Hou, L., Wang, Y., Liu, Y., Zhang, N., Shamovsky, I., Nudler, E., Tian, B. and Dynlacht, B. D. (2019). Paf1C regulates RNA polymerase II progression by modulating elongation rate. *Proc. Natl. Acad. Sci. USA* **116**, 14583-14592. doi:10.1073/pnas.1904324116
- Jaehning, J. A. (2010). The Paf1 complex: platform or player in RNA polymerase II transcription? *Biochim. Biophys. Acta* **1799**, 379-388. doi:10.1016/j.bbaggm.2010.01.001
- Juryneć, M. J. and Grunwald, D. J. (2010). SHIP2, a factor associated with diet-induced obesity and insulin sensitivity, attenuates FGF signaling in vivo. *Dis. Model. Mech.* **3**, 733-742. doi:10.1242/dmm.000703
- Juryneć, M. J., Xia, R., Mackrill, J. J., Gunther, D., Crawford, T., Flanigan, K. M., Abramson, J. J., Howard, M. T. and Grunwald, D. J. (2008). Selenoprotein N is required for ryanodine receptor calcium release channel activity in human and zebrafish muscle. *Proc. Natl. Acad. Sci. USA* **105**, 12485-12490. doi:10.1073/pnas.0806015105
- Keegan, B. R., Feldman, J. L., Lee, D. H., Koos, D. S., Ho, R. K., Stainier, D. Y. and Yelon, D. (2002). The elongation factors Pandora/Spt6 and Foggy/Spt5 promote transcription in the zebrafish embryo. *Development* **129**, 1623-1632.
- Kim, J., Guermah, M. and Roeder, R. G. (2010). The human PAF1 complex acts in chromatin transcription elongation both independently and cooperatively with SII/TFIIS. *Cell* **140**, 491-503. doi:10.1016/j.cell.2009.12.050
- Kim, S., Kim, J.-D., Chung, A.-Y., Kim, H.-S., Kim, Y.-S., Kim, M.-J., Koun, S., Lee, Y. M., Rhee, M., Park, H.-C. et al. (2012). Antagonistic regulation of PAF1C and p-TEFb is required for oligodendrocyte differentiation. *J. Neurosci.* **32**, 8201-8207. doi:10.1523/JNEUROSCI.5344-11.2012
- Kimmel, C. B., Ballard, W. W., Kimmel, S. R., Ullmann, B. and Schilling, T. F. (1995). Stages of embryonic development of the zebrafish. *Dev. Dyn.* **203**, 253-310. doi:10.1002/aja.1002030302
- Langenbacher, A. D., Nguyen, C. T., Cavanaugh, A. M., Huang, J., Lu, F. and Chen, J.-N. (2011). The PAF1 complex differentially regulates cardiomyocyte specification. *Dev. Biol.* **353**, 19-28. doi:10.1016/j.ydbio.2011.02.011
- Le Douarin, N. and Kalcheim, C. (1999). *The Neural Crest*, 2nd edn. Cambridge: Cambridge University Press.
- Levine, M. (2011). Paused RNA polymerase II as a developmental checkpoint. *Cell* **145**, 502-511. doi:10.1016/j.cell.2011.04.021
- Li, W. and Cornell, R. A. (2007). Redundant activities of Tfp2a and Tfp2c are required for neural crest induction and development of other non-neural ectoderm derivatives in zebrafish embryos. *Dev. Biol.* **304**, 338-354. doi:10.1016/j.ydbio.2006.12.042
- Li, Y., Liu, M., Chen, L.-F. and Chen, R. (2018). P-TEFb: Finding its ways to release promoter-proximally paused RNA polymerase II. *Transcription* **9**, 88-94. doi:10.1080/21541264.2017.1281864
- Link, V., Carvalho, L., Castanon, I., Stockinger, P., Shevchenko, A. and Heisenberg, C. P. (2006). Identification of regulators of germ layer morphogenesis using proteomics in zebrafish. *J. Cell Sci.* **119**, 2073-2083. doi:10.1242/jcs.02928
- Lu, X., Zhu, X., Li, Y., Liu, M., Yu, B., Wang, Y., Rao, M., Yang, H., Zhou, K., Wang, Y. et al. (2016). Multiple P-TEFbs cooperatively regulate the release of promoter-proximally paused RNA polymerase II. *Nucleic Acids Res.* **44**, 6853-6867. doi:10.1093/nar/gkw571
- Mayer, A., Landry, H. M. and Churchman, L. S. (2017). Pause & go: from the discovery of RNA polymerase pausing to its functional implications. *Curr. Opin. Cell Biol.* **46**, 72-80. doi:10.1016/j.ceb.2017.03.002
- Mayor, R., Guerrero, N. and Martínez, C. (1997). Role of FGF and noggin in neural crest induction. *Dev. Biol.* **189**, 1-12. doi:10.1006/dbio.1997.8634
- Miller, M. R., Atwood, T. S., Eames, B. F., Eberhart, J. K., Yan, Y.-L., Postlethwait, J. H. and Johnson, E. A. (2007). RAD marker microarrays enable rapid mapping of zebrafish mutations. *Genome Biol.* **8**, R105. doi:10.1186/gb-2007-8-6-r105
- Min, I. M., Waterfall, J. J., Core, L. J., Munroe, R. J., Schimenti, J. and Lis, J. T. (2011). Regulating RNA polymerase pausing and transcription elongation in embryonic stem cells. *Genes Dev.* **25**, 742-754. doi:10.1101/gad.2005511
- Mosimann, C., Hausmann, G. and Basler, K. (2006). Parafibromin/Hyrax activates Wnt/Wg target gene transcription by direct association with beta-catenin/Armadillo. *Cell* **125**, 327-341. doi:10.1016/j.cell.2006.01.053
- Mosimann, C., Hausmann, G. and Basler, K. (2009). The role of Parafibromin/Hyrax as a nuclear Gli/Ci-interacting protein in Hedgehog target gene control. *Mech. Dev.* **126**, 394-405. doi:10.1016/j.mod.2009.02.002
- Mueller, C. L. and Jaehning, J. A. (2002). Ctr9, Rtf1, and Leo1 are components of the Paf1/RNA polymerase II complex. *Mol. Cell. Biol.* **22**, 1971-1980. doi:10.1128/MCB.22.7.1971-1980.2002
- Mullins, M. C., Hammerschmidt, M., Haffter, P. and Nüsslein-Volhard, C. (1994). Large-scale mutagenesis in the zebrafish: in search of genes controlling development in a vertebrate. *Curr. Biol.* **4**, 189-202. doi:10.1016/S0960-9822(00)00048-8
- Muntean, A. G., Tan, J., Sitwala, K., Huang, Y., Bronstein, J., Connelly, J. A., Basur, V., Elenitoba-Johnson, K. S. J. and Hess, J. L. (2010). The PAF complex synergizes with MLL fusion proteins at HOX loci to promote leukemogenesis. *Cancer Cell* **17**, 609-621. doi:10.1016/j.ccr.2010.04.012
- Nechaev, S. and Adelman, K. (2011). Pol II waiting in the starting gates: Regulating the transition from transcription initiation into productive elongation. *Biochim. Biophys. Acta* **1809**, 34-45. doi:10.1016/j.bbaggm.2010.11.001
- Nechiporuk, A., Linbo, T., Poss, K. D. and Raible, D. W. (2007). Specification of epibranchial placodes in zebrafish. *Development* **134**, 611-623. doi:10.1242/dev.02749
- Ng, H. H., Dole, S. and Struhl, K. (2003). The Rtf1 component of the Paf1 transcriptional elongation complex is required for ubiquitination of histone H2B. *J. Biol. Chem.* **278**, 33625-33628. doi:10.1074/jbc.C300270200
- Nguyen, V. H., Schmid, B., Trout, J., Connors, S. A., Ekker, M. and Mullins, M. C. (1998). Ventral and lateral regions of the zebrafish gastrula, including the neural crest progenitors, are established by a bmp2b/swirl pathway of genes. *Dev. Biol.* **199**, 93-110. doi:10.1006/dbio.1998.8927
- Nguyen, C. T., Langenbacher, A., Hsieh, M. and Chen, J.-N. (2010). The PAF1 complex component Leo1 is essential for cardiac and neural crest development in zebrafish. *Dev. Biol.* **341**, 167-175. doi:10.1016/j.ydbio.2010.02.020
- Nordick, K., Hoffman, M. G., Betz, J. L. and Jaehning, J. A. (2008). Direct interactions between the Paf1 complex and a cleavage and polyadenylation factor are revealed by dissociation of Paf1 from RNA polymerase II. *Eukaryot. Cell* **7**, 1158-1167. doi:10.1128/EC.00434-07
- Park, H.-C., Boyce, J., Shin, J. and Appel, B. (2005). Oligodendrocyte specification in zebrafish requires notch-regulated cyclin-dependent kinase inhibitor function. *J. Neurosci.* **25**, 6836-6844. doi:10.1523/JNEUROSCI.0981-05.2005
- Penheiter, K. L., Washburn, T. M., Porter, S. E., Hoffman, M. G. and Jaehning, J. A. (2005). A posttranscriptional role for the yeast Paf1-RNA polymerase II complex is revealed by identification of primary targets. *Mol. Cell* **20**, 213-223. doi:10.1016/j.molcel.2005.08.023
- Peterlin, B. M. and Price, D. H. (2006). Controlling the elongation phase of transcription with P-TEFb. *Mol. Cell* **23**, 297-305. doi:10.1016/j.molcel.2006.06.014
- Pittman, A. J., Law, M.-Y. and Chien, C.-B. (2008). Pathfinding in a large vertebrate axon tract: isotopic interactions guide retinotectal axons at multiple choice points. *Development* **135**, 2865-2871. doi:10.1242/dev.025049
- Ponnusamy, M. P., Deb, S., Dey, P., Chakraborty, S., Rachagani, S., Senapati, S. and Batra, S. K. (2009). RNA polymerase II associated factor 1/PD2 maintains self-renewal by its interaction with Oct3/4 in mouse embryonic stem cells. *Stem Cells* **27**, 3001-3011. doi:10.1002/stem.237
- Rahl, P. B., Lin, C. Y., Seila, A. C., Flynn, R. A., McCuine, S., Burge, C. B., Sharp, P. A. and Young, R. A. (2010). c-Myc regulates transcriptional pause release. *Cell* **141**, 432-445. doi:10.1016/j.cell.2010.03.030
- Robu, M. E., Larson, J. D., Nasevicius, A., Beiraghi, S., Brenner, C., Farber, S. A. and Ekker, S. C. (2007). p53 activation by knockdown technologies. *PLoS Genet.* **3**, e78. doi:10.1371/journal.pgen.0030078
- Rougvie, A. E. and Lis, J. T. (1988). The RNA polymerase II molecule at the 5' end of the uninduced hsp70 gene of D. melanogaster is transcriptionally engaged. *Cell* **54**, 795-804. doi:10.1016/S0092-8674(88)91087-2
- Rozenblatt-Rosen, O., Nagaïke, T., Francis, J. M., Kaneko, S., Glatt, K. A., Hughes, C. M., LaFramboise, T., Manley, J. L. and Meyerson, M. (2009). The

- tumor suppressor Cdc73 functionally associates with CPSF and CstF 3' mRNA processing factors. *Proc. Natl. Acad. Sci. USA* **106**, 755-760. doi:10.1073/pnas.0812023106
- Sheldon, K. E., Mauger, D. M. and Arndt, K. M.** (2005). A Requirement for the *Saccharomyces cerevisiae* Paf1 complex in snoRNA 3' end formation. *Mol. Cell* **20**, 225-236. doi:10.1016/j.molcel.2005.08.026
- Simoës-Costa, M. and Bronner, M. E.** (2015). Establishing neural crest identity: a gene regulatory recipe. *Development* **142**, 242-257. doi:10.1242/dev.105445
- Squazzo, S. L., Costa, P. J., Lindstrom, D. L., Kumer, K. E., Simic, R., Jennings, J. L., Link, A. J., Arndt, K. M. and Hartzog, G. A.** (2002). The Paf1 complex physically and functionally associates with transcription elongation factors in vivo. *EMBO J.* **21**, 1764-1774. doi:10.1093/emboj/21.7.1764
- Strikoudis, A., Lazaris, C., Trimarchi, T., Galvao Neto, A. L., Yang, Y., Ntziachristos, P., Rothbart, S., Buckley, S., Dolgalev, I., Stadtfeld, M. et al.** (2016). Regulation of transcriptional elongation in pluripotency and cell differentiation by the PHD-finger protein Phf5a. *Nat. Cell Biol.* **18**, 1127-1138. doi:10.1038/ncb3424
- Tastemel, M., Gogate, A. A., Malladi, V. S., Nguyen, K., Mitchell, C., Banaszynski, L. A. and Bai, X.** (2017). Transcription pausing regulates mouse embryonic stem cell differentiation. *Stem Cell Res.* **25**, 250-255. doi:10.1016/j.scr.2017.11.012
- Van Oss, S. B., Shirra, M. K., Bataille, A. R., Wier, A. D., Yen, K., Vinayachandran, V., Byeon, I.-J. L., Cucinotta, C. E., Héroux, A., Jeon, J. et al.** (2016). The histone modification domain of Paf1 complex subunit Rtf1 directly stimulates H2B ubiquitylation through an interaction with Rad6. *Mol. Cell* **64**, 815-825. doi:10.1016/j.molcel.2016.10.008
- Van Oss, S. B., Cucinotta, C. E. and Arndt, K. M.** (2017). Emerging insights into the roles of the Paf1 complex in gene regulation. *Trends Biochem. Sci.* **42**, 788-798. doi:10.1016/j.tibs.2017.08.003
- Vega-Lopez, G. A., Cerrizuela, S. and Aybar, M. J.** (2017). Trunk neural crest cells: formation, migration and beyond. *Int. J. Dev. Biol.* **61**, 5-15. doi:10.1387/ijdb.160408gv
- Villanueva, S., Glavic, A., Ruiz, P. and Mayor, R.** (2002). Posteriorization by FGF, Wnt, and retinoic acid is required for neural crest induction. *Dev. Biol.* **241**, 289-301. doi:10.1006/dbio.2001.0485
- Vos, S. M., Farnung, L., Boehning, M., Wigge, C., Linden, A., Urlaub, H. and Cramer, P.** (2018a). Structure of activated transcription complex Pol II-DSIF-PAF-SPT6. *Nature* **560**, 607-612. doi:10.1038/s41586-018-0440-4
- Vos, S. M., Farnung, L., Urlaub, H. and Cramer, P.** (2018b). Structure of paused transcription complex Pol II-DSIF-NELF. *Nature* **560**, 601-606. doi:10.1038/s41586-018-0442-2
- Wang, W.-D., Melville, D. B., Montero-Balaguer, M., Hatzopoulos, A. K. and Knapik, E. W.** (2011). Tfp2a and Foxd3 regulate early steps in the development of the neural crest progenitor population. *Dev. Biol.* **360**, 173-185. doi:10.1016/j.ydbio.2011.09.019
- Westerfield, M.** (2000). *The Zebrafish Book*. Eugene: University of Oregon Press.
- White, R. M., Cech, J., Ratanasirintraooot, S., Lin, C. Y., Rahl, P. B., Burke, C. J., Langdon, E., Tomlinson, M. L., Mosher, J., Kaufman, C. et al.** (2011). DHODH modulates transcriptional elongation in the neural crest and melanoma. *Nature* **471**, 518-522. doi:10.1038/nature09882
- Yang, Q., Liu, X., Zhou, T., Cook, J., Nguyen, K. and Bai, X.** (2016). RNA polymerase II pausing modulates hematopoietic stem cell emergence in zebrafish. *Blood* **128**, 1701-1710. doi:10.1182/blood-2016-02-697847
- Yu, M., Yang, W., Ni, T., Tang, Z., Nakadai, T., Zhu, J. and Roeder, R. G.** (2015). RNA polymerase II-associated factor 1 regulates the release and phosphorylation of paused RNA polymerase II. *Science* **350**, 1383-1386. doi:10.1126/science.aad2338
- Zhou, Q., Li, T. and Price, D. H.** (2012). RNA polymerase II elongation control. *Annu. Rev. Biochem.* **81**, 119-143. doi:10.1146/annurev-biochem-052610-095910
